# Supplementary material for: A facile sacrificial template method to synthesize one-dimensional porous CdO/CdFe2O4 hybrid nanoneedles with superior adsorption performance
Source: Royal Society of Chemistry journal article supplement (doi:10.1039/c6ra27000j), 2017-01-01
Supplement: c6ra27000j1.pdf [file c6ra27000j1.pdf]

**ESI:**

**A Facile Sacrificial Template Method to Synthesize One-dimensional Porous CdO/CdFe<sub>2</sub>O<sub>4</sub> Hybrid Nanoneedles with Superior Adsorption Performance**

Yadan Wu,<sup>b</sup> Enlai Hu,<sup>b</sup> Wei Dai,<sup>b</sup> Zhipeng Li,<sup>b</sup> Yijun Zhong,<sup>a,c\*</sup> and Yong Hu<sup>a,b\*</sup>

<sup>a</sup>*Hangzhou Institute of Advanced Studies, Zhejiang Normal University, Hangzhou, 311231, P. R. China E-mail: [yonghu@zjnu.edu.cn](mailto:yonghu@zjnu.edu.cn)*

<sup>b</sup>*Institute of Physical Chemistry, Zhejiang Normal University, Jinhua, 321004, P. R. China.*

<sup>c</sup>*Jinhua Polytechnic, Jinhua, 321004, P. R. China*

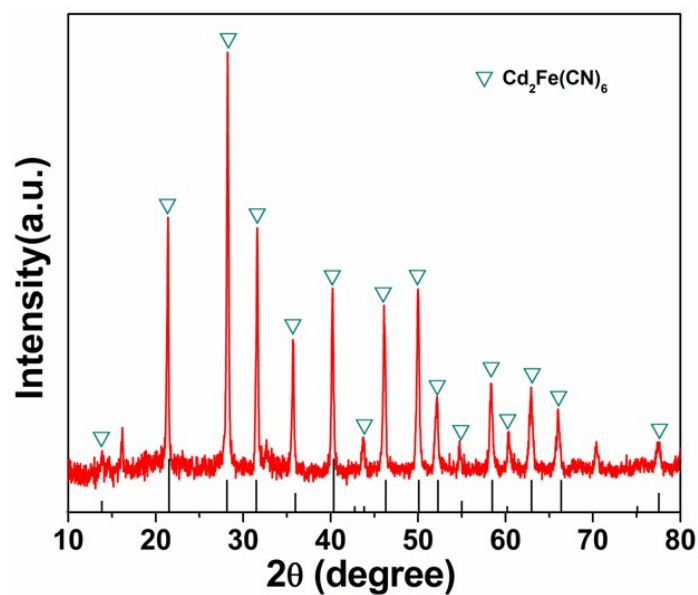

Fig. S1. XRD pattern of the as-prepared  $\text{Cd}_2\text{Fe}(\text{CN})_6$  NNs precursor.

**Table S1.** Adsorption capacities of CR on various adsorbents.

| adsorbent                                                                    | adsorption capacity<br>( $\text{mg g}^{-1}$ ) | references |
|------------------------------------------------------------------------------|-----------------------------------------------|------------|
| porous $\text{CdO}/\text{CdFe}_2\text{O}_4$ nanoneedle                       | 1491                                          | This work  |
| Mesoporous $\text{MgO}$ architectures                                        | 690                                           | 1          |
| Mesoporous carbon-incorporated $\text{ZnO}$                                  | 162                                           | 10         |
| $\text{MnO}_2$ Hierarchical Hollow Nanostructures                            | 80                                            | 20         |
| Urchin-like $\alpha\text{-FeOOH}$ hollow spheres                             | 275                                           | 23         |
| $\text{NiFe}_2\text{O}_4/\text{ZnO}$ hybrids                                 | 222                                           | 33         |
| $\text{CoFe}_2\text{O}_4/\text{NiFe}_2\text{O}_4/\text{MnFe}_2\text{O}_4$    | 244/97/92                                     | 34         |
| Hierarchically porous $\text{NiO}-\text{Al}_2\text{O}_3$                     | 357                                           | 35         |
| Spindle-like boehmites                                                       | 427                                           | 36         |
| Hierarchical $\gamma\text{-AlOOH}/\gamma\text{-Al}_2\text{O}_3$ microspheres | 214/416                                       | 37         |
| $\text{Fe}_3\text{O}_4@\text{meso C}$                                        | 1657                                          | 38         |

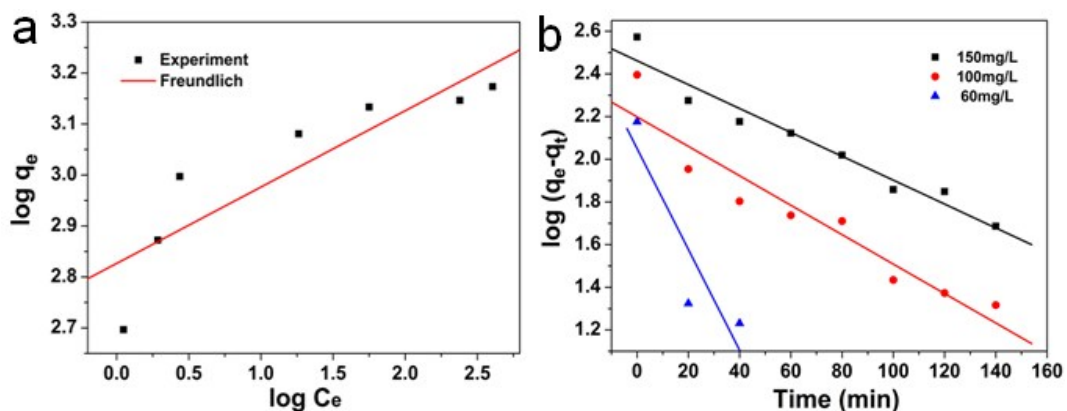

**Fig. S2.** (a) The values of  $\log q_e$  against  $\log C_e$  based on the Freundlich isotherm model. (b) the pseudo-first-order kinetics rates for adsorption of CR on the as-obtained porous CdO/CdFe<sub>2</sub>O<sub>4</sub> HNNs.

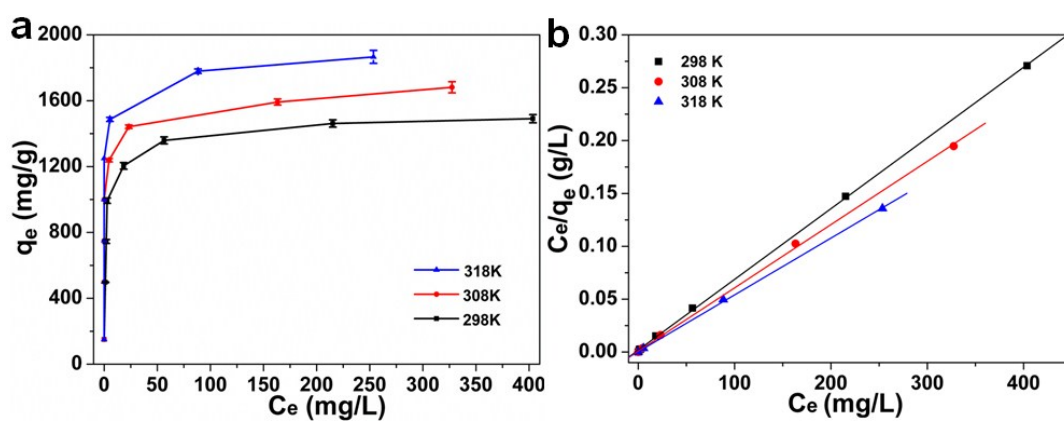

**Fig. S3.** (a) Effects of temperature for different CR concentrations on the adsorption performance of porous CdO/CdFe<sub>2</sub>O<sub>4</sub> (b) the linear dependence based on the Langmuir isotherm model for different temperature. The error bar represents the standard deviations ( $n = 3$ ).

**Table S2.** Parameters and standard deviations of Langmuir and Freundlich isotherm equations for the adsorption of CR on porous CdO/CdFe<sub>2</sub>O<sub>4</sub> HNNs.

| Langmuir                    |       |         |         | Freundlich |      |         |         |
|-----------------------------|-------|---------|---------|------------|------|---------|---------|
| $q_m$ (mg g <sup>-1</sup> ) | $K_L$ | $R^2$   | S.D.(%) | $K_f$      | $n$  | $R^2$   | S.D.(%) |
| 1494                        | 0.37  | 0.99978 | 0.35    | 667        | 6.47 | 0.75854 | 8.86    |

**Table S3.** The linear correlation coefficients and standard deviations of Langmuir isotherm equations for different temperature.

| Temperature(K) | $q_m$ (mg g <sup>-1</sup> ) | $K_L$ ( $\times 10^3$ L mol <sup>-1</sup> ) | $R^2$   | S.D.(%) |
|----------------|-----------------------------|---------------------------------------------|---------|---------|
| 298            | 1490.8                      | 259.2                                       | 0.99978 | 0.15    |
| 308            | 1672.4                      | 494.6                                       | 0.99919 | 0.20    |
| 318            | 1862.3                      | 1158.6                                      | 0.99967 | 0.08    |

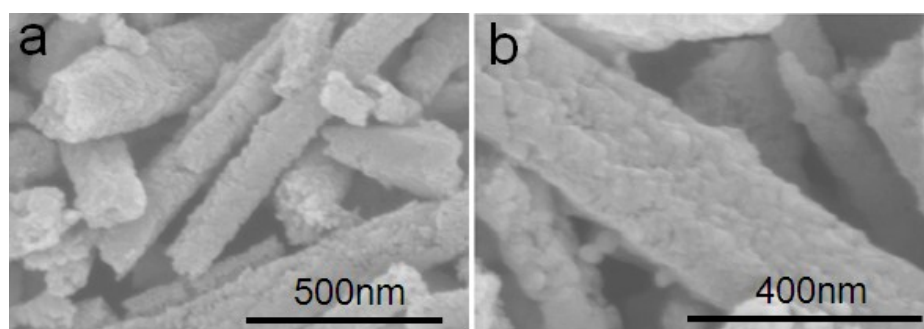

**Fig. S4.** (a, b) SEM images of the CR-adsorbed CdO/CdFe<sub>2</sub>O<sub>4</sub> HNNs.
